# Supplementary material for: Intestinal adherence associated with type IV pili of enterohemorrhagic Escherichia coli O157:H7
Source: JCI journal article supplement (doi:10.1172/jci30727), 2007-10-19
Supplement: sd1 [file 1]

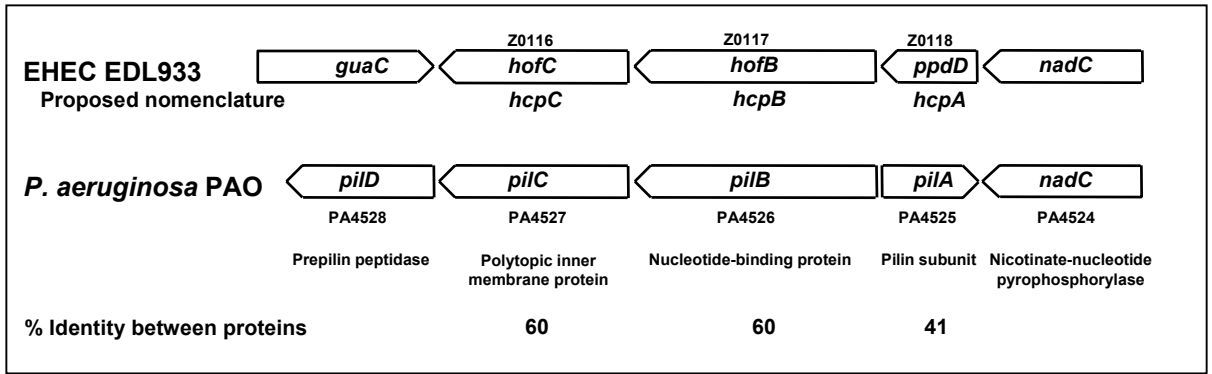

### Supplemental Figure 1

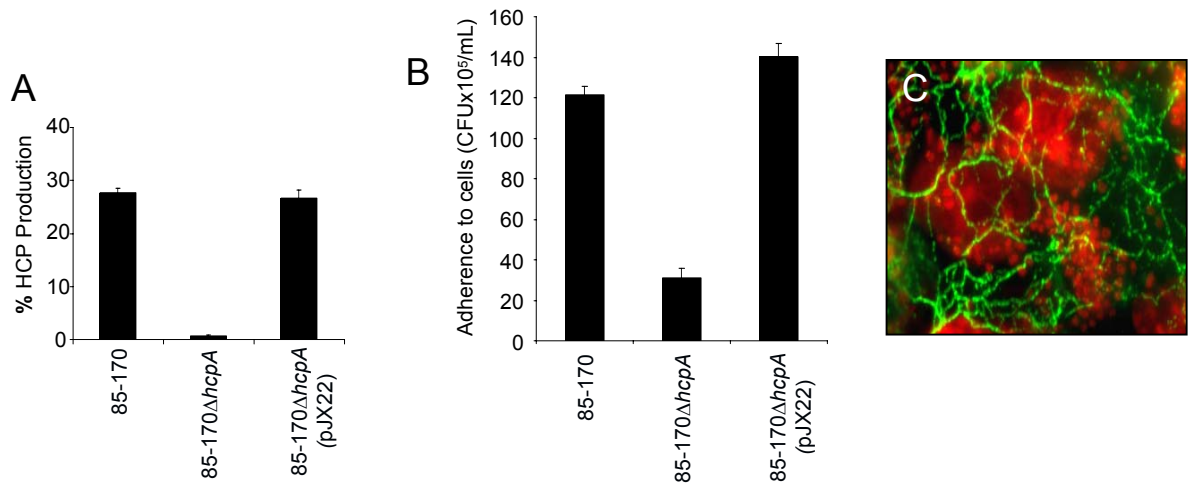

### Supplemental Figure 2

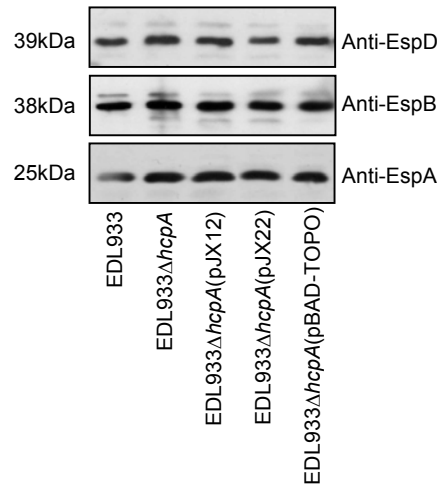

**Supplemental Figure 3**

### **Supplemental Figure 1**

Organization of the TFP genes in EHEC O157:H7 strain EDL933. The TFP gene cluster located at 2.5 min of the EDL933 chromosome, contains the *hcpA*, *hcpB*, and *hcpC* genes. The product of *hcpA* is homologous to the family of class A TFP pilins (e.g. 41% identical to PilA of *P. aeruginosa*). Note that the *nadC* gene flanks *pilA* and *hcpA* whose orientation is different in the organisms. The predicted HcpB and HcpC are 60% identical to PilB and PilC of *P. aeruginosa*, respectively. *pilD* is missing in EDL933. The numbers above and below the open reading frames correspond to accession numbers.

### **Supplemental Figure 2**

Production of HCP by EHEC O157:H7 strain 85-170. (A) Flow cytometry data showing production of HCP in 85-170 (Stx-minus) and 85-170 $\Delta$ *hcpA*(pJX22) but not in the 85-170 $\Delta$ *hcpA*. (B) Quantification of adherence of 85-170 and derivative strains to human intestinal HT-29 cells for 6 hours. The adherent bacteria are expressed as colony-forming-units (CFUs). (C) Immunofluorescence of HCP-producing 85-170 $\Delta$ *hcpA* (pJX22) to HT-29 cells.

### **Supplemental Figure 3**

Confirmation of production of T3SS-associated proteins. Production of EspA, EspB, and EspD was analysed by Western blotting using specific antibodies. As described in the text, the *hcpA* mutant remained capable of synthesizing these proteins and to produce AE lesions.
